# Supplementary material for: Hydrodemethoxylation/Dealkylation on Bifunctional Nanosized Zeolite Beta
Source: MDPI journal article supplement (doi:10.3390/molecules26247694), 2021-12-20
Supplement: s1 [file s1]

## Supplementary materials

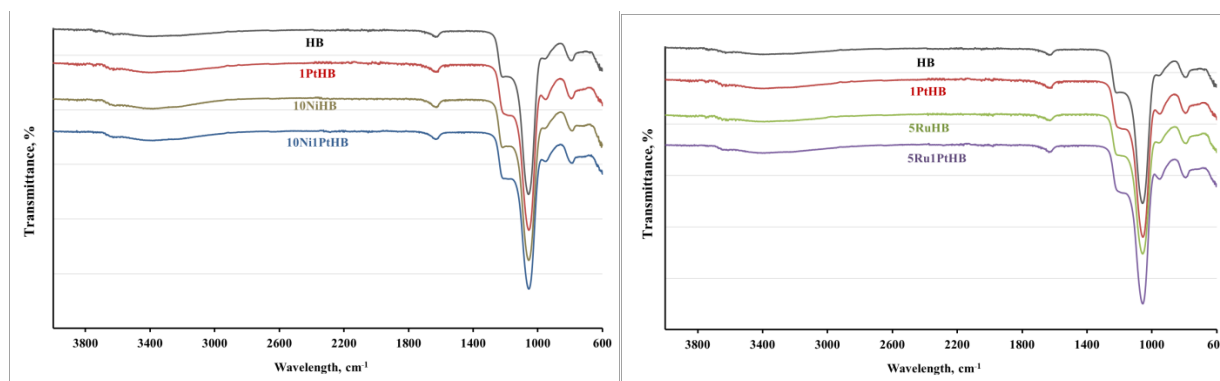

**Figure S1.** ART FTIR spectra of the initial and modified zeolites.

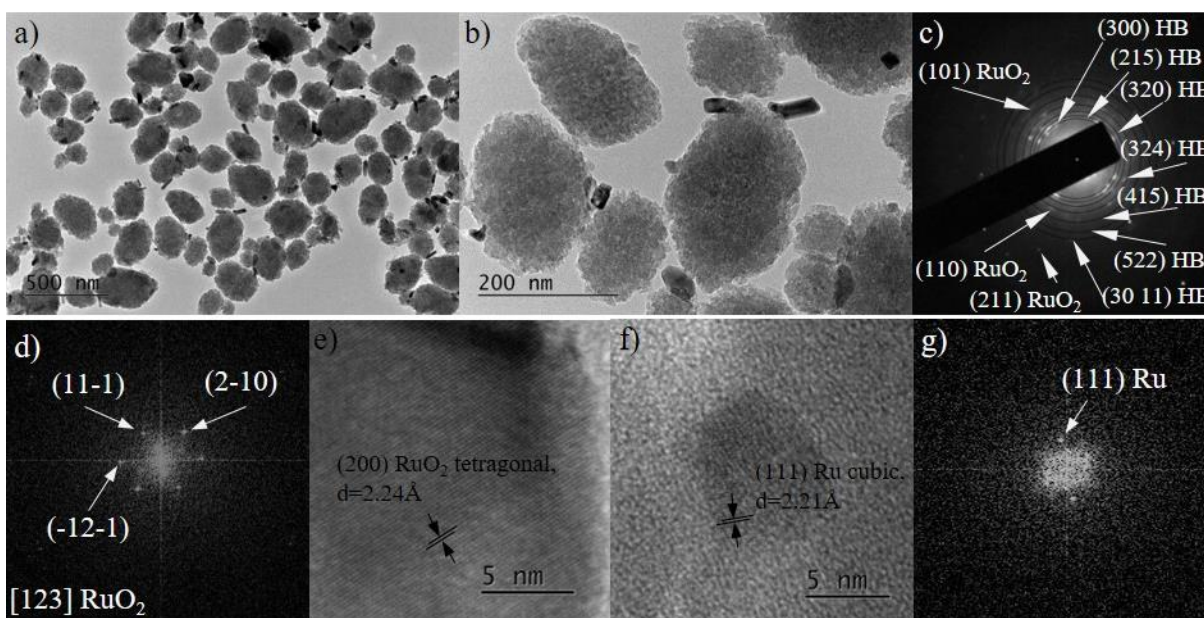

**Figure S2.** Bright Field TEM (BFTEM) images of 5Ru/HB at magnification 10000x (a) and 40000x (b). SAED patterns (c), HRTEM images (e, f) and the corresponding Fast Fourier Transform (FFT) patterns (d, g) of 5Ru/HB sample.

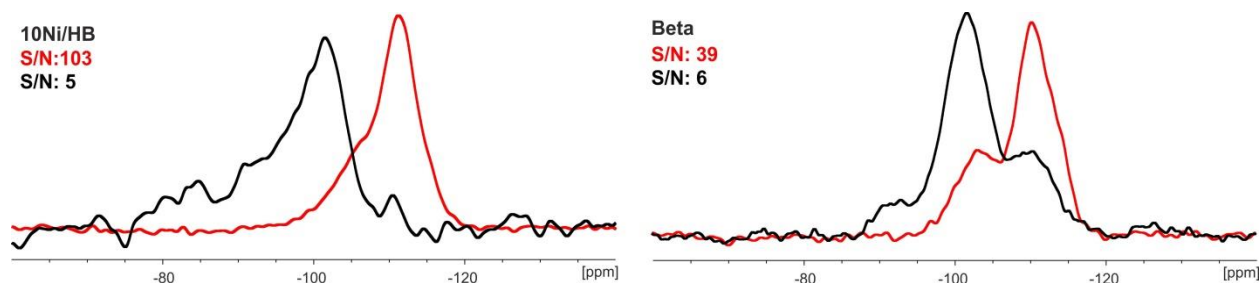

**Figure S3.** Comparison of the  $^1\text{H} \rightarrow ^{29}\text{Si}$  CP (black) and single pulse (red)  $^{29}\text{Si}$  NMR spectra of samples 10Ni/HB and Beta. The lower signal-to-noise (S/N) ratio for the  $^1\text{H} \rightarrow ^{29}\text{Si}$  CP spectra as compared to the single pulse experiments indicates the low efficiency of the magnetization transfer due to generally low amount of silanol groups present in the samples.

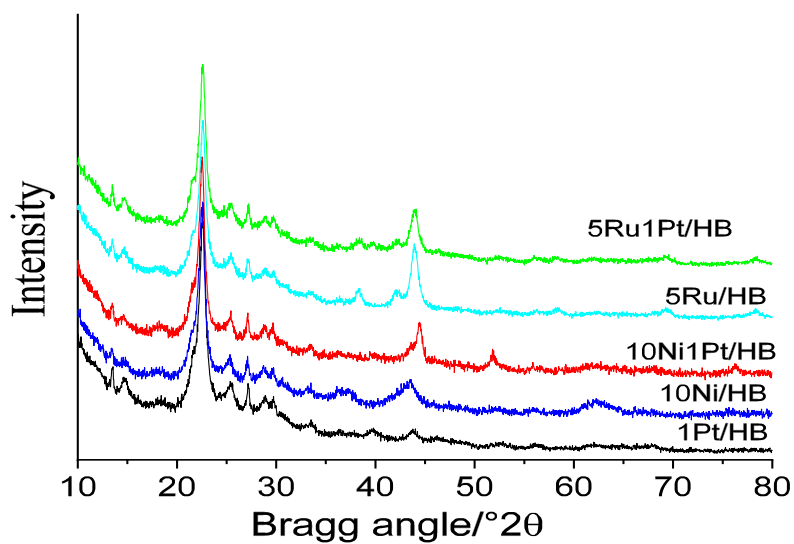

**Figure S4.** XRD of the spent catalysts.
